# Supplementary material for: Rhombic porous CoP2 nanowire arrays synthesized by alkaline etching as highly active hydrogen-evolution-reaction electrocatalysts
Source: Royal Society of Chemistry journal article supplement (doi:10.1039/c8ta06462h), 2018-01-01
Supplement: c8ta06462h1.pdf [file c8ta06462h1.pdf]

1  
2  
3  
4  
5  
6  
7  
8  
9  
10  
11  
12  
13  
14  
15

## Electronic Supplementary Information

### **Rhombic Porous CoP<sub>2</sub> Nanowire Arrays Synthesized by Alkaline Etching as Highly Active Hydrogen-Evolution-Reaction Electrocatalysts**

Yi Zhou, Yuying Yang,\* Ruijing Wang, Xiaotong Wang, Xinyuan Zhang, Lulu Qiang, Wenbin Wang, Qian Wang, Zhongai Hu\*

Key Laboratory of Eco-Environment-Related Polymer Materials of Ministry of Education, Key Laboratory of Polymer Materials of Gansu Province, College of Chemistry and Chemical Engineering, Northwest Normal University, Lanzhou, Gansu 730070, China. \*E-mail: 490230698@qq.com (Y. Yang); zhongai@nwnu.edu.cn(Z. Hu).; Fax: +86 931 8859764; Tel: +86 931 7973255

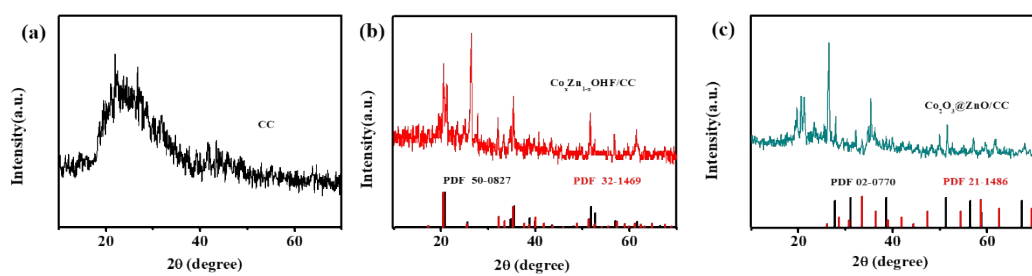

1

2

**Fig. S1.** XRD pattern of (a) CC; (b)  $\text{Co}_x\text{Zn}_{1-x}\text{OHF}/\text{CC}$ ; (c)  $\text{Co}_2\text{O}_3@\text{ZnO}/\text{CC}$ .

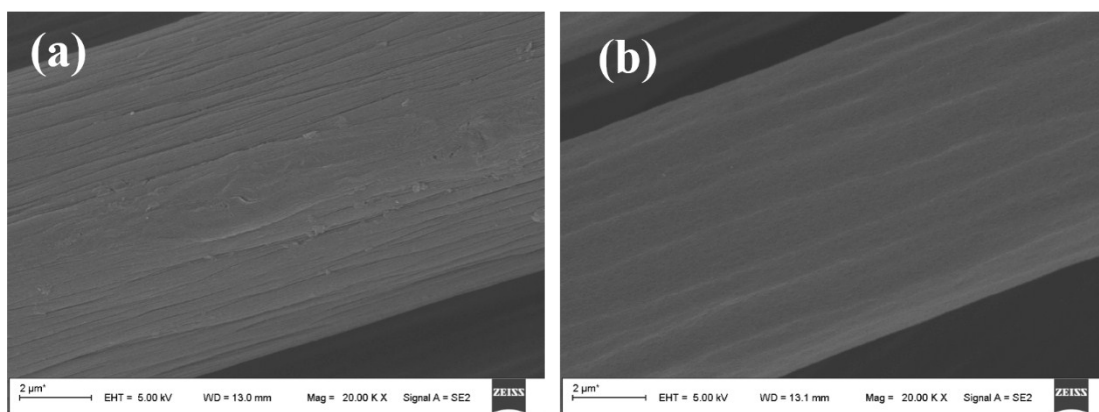

3

**Fig. S2.** SEM image of (a) Untreated Carbon Cloth, (b) Electro-etched of Carbon Cloth.

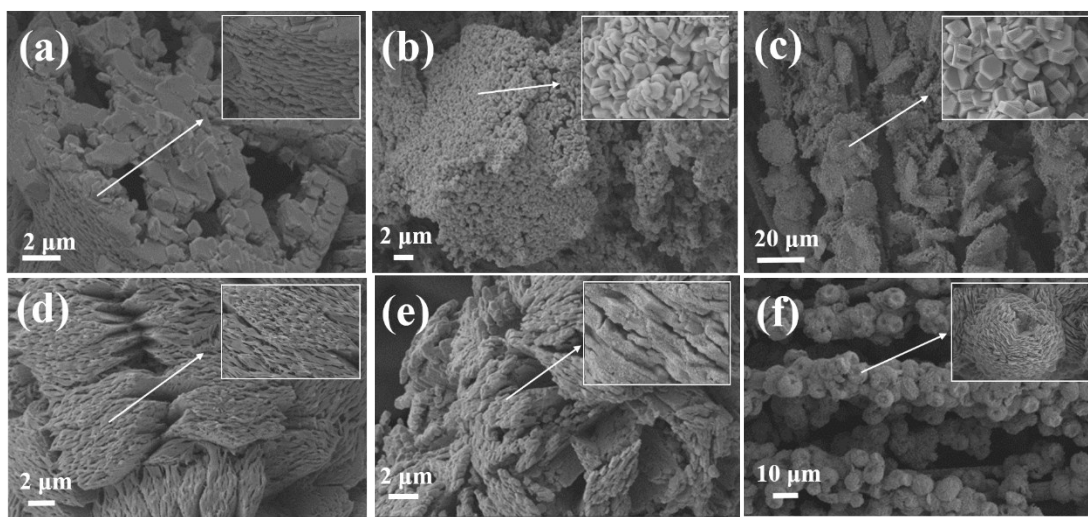

5

**Fig. S3.** SEM image of (a)  $\text{CoP}_2/\text{CC}$  -1, (b)  $\text{CoP}_2/\text{CC}$  -2, (c)  $\text{CoP}_2/\text{CC}$  -3, (d)  $\text{CoP}_2/\text{CC}$  -4, (e)

7

$\text{CoP}_2/\text{CC}$  -5 and (f)  $\text{CoP}_2/\text{CC}$  -0.

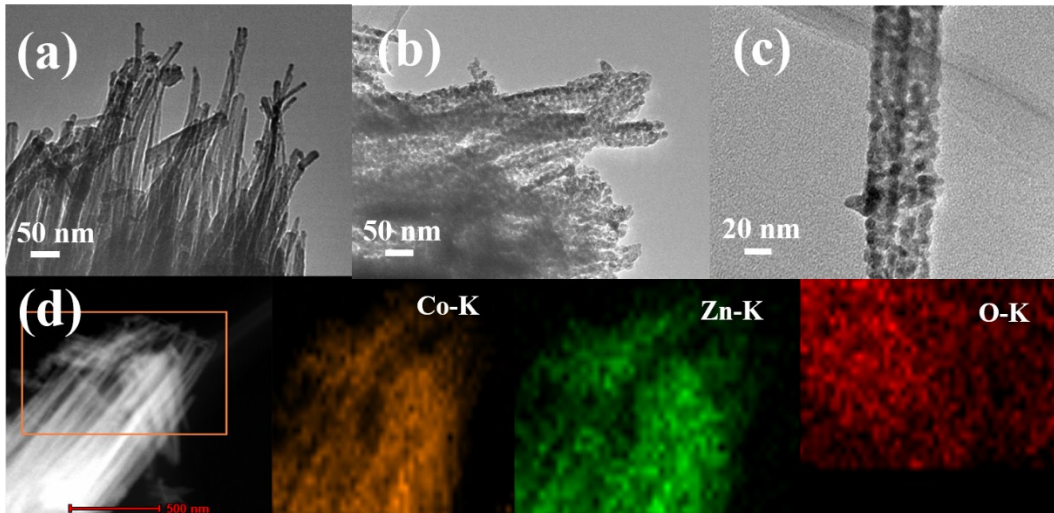

1

2

**Fig. S4.** (a) TEM image of  $\text{Co}_x\text{Zn}_{1-x}\text{OHF}$ ; (b, c) TEM image of  $\text{Co}_2\text{O}_3@\text{ZnO}$ ; (d) Element

3

mapping of the  $\text{Co}_2\text{O}_3@\text{ZnO}$ .

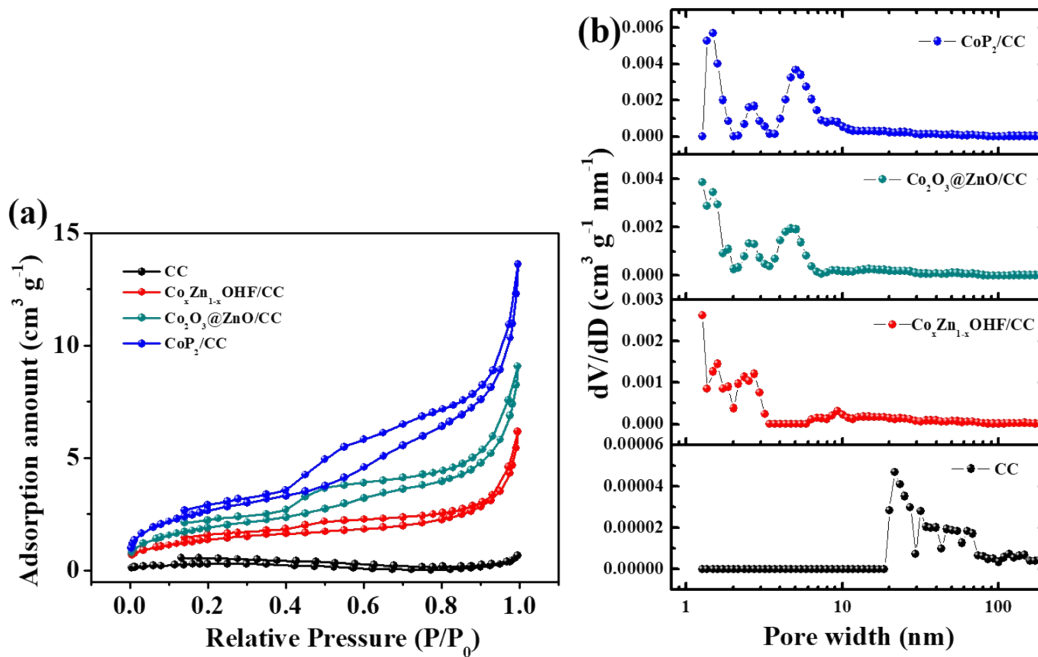

4

5

**Fig. S5.** (a) Nitrogen adsorption-desorption isotherm and (b) pore size distribution plot of CC,

6

$\text{Co}_x\text{Zn}_{1-x}\text{OHF}/\text{CC}$ ,  $\text{Co}_2\text{O}_3@\text{ZnO}/\text{CC}$  and  $\text{CoP}_2/\text{CC}$  samples.

7

The porous structure of the samples is further determined by a  $\text{N}_2$

8

adsorption-desorption test. As shown in Fig. S5(a), the typical type-IV isotherm with

1 a distinct hysteresis loop was observed for CoP<sub>2</sub>/CC catalyst, indicating abundant  
 2 mesoporous structure.<sup>18</sup> The BET surface area of CC, Co<sub>x</sub>Zn<sub>1-x</sub>OHF/CC,  
 3 Co<sub>2</sub>O<sub>3</sub>@ZnO/CC and CoP<sub>2</sub>/CC are 0.9252, 4.8070, 6.8028 and 9.5234 m<sup>2</sup> g<sup>-1</sup>.  
 4 Obviously, an increase of BET surface area from 6.8028 m<sup>2</sup> g<sup>-1</sup> (Co<sub>2</sub>O<sub>3</sub>@ZnO/CC) to  
 5 9.5234 m<sup>2</sup> g<sup>-1</sup> (CoP<sub>2</sub>/CC) was observed, indicating that the alkaline etching of  
 6 Co<sub>2</sub>O<sub>3</sub>@ZnO/CC to remove the ZnO matrix obviously increases the surface area of  
 7 CoP<sub>2</sub>/CC. Moreover, the hierarchical porous configuration of the samples is also  
 8 confirmed by the pore size distribution plot, as shown in Fig. S5(b). The  
 9 meso/macropores of CC was observed. The micropores of Co<sub>x</sub>Zn<sub>1-x</sub>OHF/CC,  
 10 Co<sub>2</sub>O<sub>3</sub>@ZnO/CC and CoP<sub>2</sub>/CC are centered at around 1.27, 1.27, and 1.48 nm,  
 11 respectively. The two region mesopores of Co<sub>x</sub>Zn<sub>1-x</sub>OHF/CC, Co<sub>2</sub>O<sub>3</sub>@ZnO/CC and  
 12 CoP<sub>2</sub>/CC are centered at around 2.52 and 2.73, 2.73 and 4.66, 2.73 and 5.04 nm,  
 13 respectively. It is obviously observed that CoP<sub>2</sub>/CC shows a relatively abundant  
 14 micropores. This result is consistent with TEM image of Fig.2 and Fig.S4. The porosity  
 15 of CoP<sub>2</sub>/CC catalyst is beneficial for mass transport for electrocatalysis.<sup>19</sup>

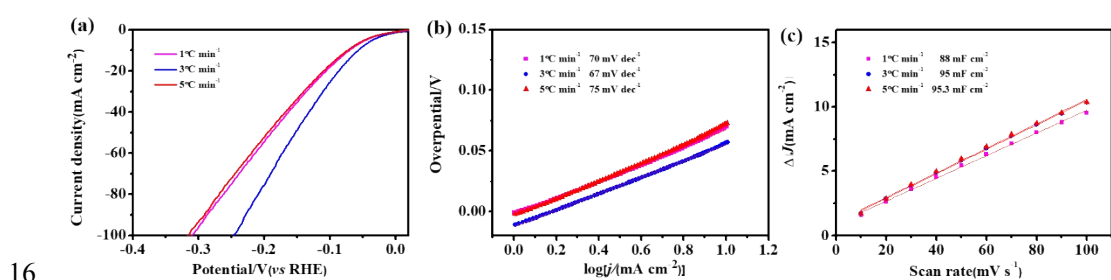

16 **Fig. S6.** (a) LSV curves, (b) Tafel plots, and (c) ECSA of CoP<sub>2</sub>/CC-4 at different annealing rate in  
 17 0.5M H<sub>2</sub>SO<sub>4</sub> solution.

18

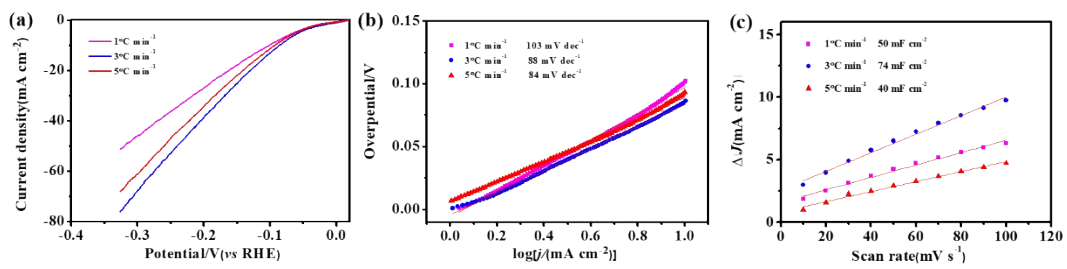

1

2 **Fig. S7.** (a)LSV curves, (b) Tafel plots, and (c) ECSA of CoP<sub>2</sub>/CC-4 at different annealing rate in

3

1M KOH solution.

4

1 **Table S1.** Comparison of HER performance in acidic electrolytes for CoP<sub>2</sub>/CC-4 with other HER  
 2 electrocatalysts.

| Catalysts                    | $\eta_j$<br>(mV) | j<br>(mA<br>cm <sup>-2</sup> ) | Tafel slope<br>(mV dec <sup>-1</sup> ) | exchange<br>current<br>density<br>(mA cm <sup>-2</sup> ) | Loading<br>mass<br>(mg cm <sup>-2</sup> ) | Ref.         |
|------------------------------|------------------|--------------------------------|----------------------------------------|----------------------------------------------------------|-------------------------------------------|--------------|
| Co <sub>2</sub> P@C/CC       | 103              | 10                             | 40.8                                   | 0.29                                                     | -                                         | 1            |
| MoP/RGO                      | 118              | 20                             | 58                                     | 0.201                                                    | -                                         | 2            |
| CoS/CC                       | 212              | 10                             | 112                                    | -                                                        | 3.5                                       | 3            |
| CoP-NTs                      | 152              | 10                             | 50                                     | -                                                        | 0.35                                      | 4            |
| MoS <sub>2</sub> /G-20       | 110              | 10                             | 67.4                                   | 0.14                                                     | -                                         | 5            |
| Mo <sub>2</sub> C nanotube   | 172              | 10                             | 62                                     | 0.017                                                    | -                                         | 6            |
|                              | 197              | 20                             |                                        |                                                          |                                           |              |
| CoP <sub>3</sub> CPs         | 78               | 10                             | 53                                     | 0.209                                                    | -                                         | 7            |
| Co/CoP-5                     | 178              | 10                             | 59.1                                   | -                                                        | 0.88                                      | 8            |
|                              | 195              | 20                             |                                        |                                                          |                                           |              |
| HNDM-Co/CoP                  | 135              | 10                             | 64                                     | -                                                        | -                                         | 9            |
| Ni <sub>2</sub> P-CoP        | 105              | 10                             | 64                                     | -                                                        | -                                         | 10           |
| Co <sub>2</sub> P/Ti         | 95               | 10                             |                                        | -                                                        | 1                                         | 11           |
|                              | 109              | 20                             |                                        |                                                          |                                           |              |
| CoP@NC                       | 78               | 10                             | 49                                     | -                                                        | 0.306                                     | 12           |
| CoP/CC                       | 67               | 10                             | 51                                     | 0.288                                                    | 0.92                                      | 13           |
|                              | 100              | 20                             |                                        |                                                          |                                           |              |
| mp-Ni <sub>2</sub> P/Ni foam | 140              | 20                             | 68.9                                   | -                                                        | 2                                         | 14           |
| CoP <sub>2</sub> /CC-4       | 56               | 10                             | 67                                     | 1.5348                                                   | 4.69                                      | This<br>work |
|                              | 86               | 20                             |                                        |                                                          |                                           |              |

3  
4

1 **Table S2.** Comparison of HER performance in alkaline electrolytes for CoP<sub>2</sub>/CC-4 with other

2 HER electrocatalysts.

| Catalysts                                              | $\eta_j$<br>(mV) | $j$<br>(mA<br>cm <sup>-2</sup> ) | Tafel slope<br>(mVdec <sup>-1</sup> ) | exchange<br>current<br>density<br>(mA cm <sup>-2</sup> ) | Loading<br>mass<br>(mg cm <sup>-2</sup> ) | Ref.         |
|--------------------------------------------------------|------------------|----------------------------------|---------------------------------------|----------------------------------------------------------|-------------------------------------------|--------------|
| Co-B@CoO/Ti                                            | 61               | 10                               | 78                                    | -                                                        | 4.87                                      | 15           |
| Fe-Doped CoP                                           | 78               | 10                               | 75                                    | -                                                        | 1.03                                      | 16           |
| CoS/CC                                                 | 197              | 10                               | 105                                   | -                                                        | 3.5                                       | 3            |
| f-CoP/CoP <sub>2</sub> /Al <sub>2</sub> O <sub>3</sub> | 300              | 10                               | 73                                    | -                                                        | 0.2                                       | 17           |
| Co/CoP-5                                               | 253              | 10                               | 73.8                                  | -                                                        | 0.88                                      | 8            |
| HNDCM-Co/CoP                                           | 135              | 10                               | 64                                    | -                                                        | -                                         | 9            |
| Co <sub>2</sub> P/Ti                                   | 95<br>109        | 10<br>20                         |                                       | -                                                        | 1                                         | 11           |
| CoP@NC                                                 | 129              | 10                               | 58                                    | -                                                        | 0.306                                     | 12           |
| CoP/CC                                                 | 209              | 10                               | 129                                   | 0.288                                                    | 0.92                                      | 13           |
| mp-Ni <sub>2</sub> P/Ni foam                           | 140              | 20                               | 68.9                                  | -                                                        | 2                                         | 14           |
| CoP <sub>2</sub> /CC-4                                 | 72<br>114        | 10<br>20                         | 88                                    | 1.1236                                                   | 4.69                                      | This<br>work |

3

4

## 1 References

- 2 1. C. Ye, M. Q. Wang, G. Chen, Y. H. Deng, L. J. Li, H. Q. Luo and N. B. Li, *Journal of Materials Chemistry A*  
3 2017, **5**, 7791-7795.
- 4 2. G. Zhang, G. Wang, Y. Liu, H. Liu, J. Qu and J. Li, *Journal of the American Chemical Society*, 2016, **138**,  
5 14686-14693.
- 6 3. N. Li, X. Liu, G.-D. Li, Y. Wu, R. Gao and X. Zou, *International Journal of Hydrogen Energy*, 2017, **42**, 9914-  
7 9921.
- 8 4. Y. E. Miao, F. Li, Y. Zhou, F. Lai, H. Lu and T. Liu, *Nanoscale*, 2017, **9**, 16313-16320.
- 9 5. L. Ma, Y. Hu, G. Zhu, R. Chen, T. Chen, H. Lu, Y. Wang, J. Liang, H. Liu, C. Yan, Z. Tie, Z. Jin and J. Liu,  
10 *Chemistry of Materials*, 2016, **28**, 5733-5742.
- 11 6. F. X. Ma, H. B. Wu, B. Y. Xia, C. Y. Xu and X. W. Lou, *Angewandte Chemie*, 2015, **54**, 15395-15399.
- 12 7. T. L. Wu, M. Y. Pi, X. D. Wang, D. K. Zhang and S. J. Chen, *Physical Chemistry Chemical Physics*. 2017, **19**,  
13 2104-2110.
- 14 8. Z.-H. Xue, H. Su, Q.-Y. Yu, B. Zhang, H.-H. Wang, X.-H. Li and J.-S. Chen, *Advanced Energy Materials*, 2017,  
15 **7**, 1602355.
- 16 9. H. Wang, S. Min, Q. Wang, D. Li, G. Casillas, C. Ma, Y. Li, Z. Liu, L. J. Li, J. Yuan, M. Antonietti and T. Wu,  
17 *ACS nano*, 2017, **11**, 4358-4364.
- 18 10. X. Liang, B. Zheng, L. Chen, J. Zhang, Z. Zhuang and B. Chen, *ACS applied materials & interfaces*, 2017, **9**,  
19 23222-23229.
- 20 11. J. F. Callejas, C. G. Read, E. J. Popczun, J. M. McEnaney and R. E. Schaak, *Chemistry of Materials*, 2015, **27**,  
21 3769-3774.
- 22 12. F. Yang, Y. Chen, G. Cheng, S. Chen and W. Luo, *ACS Catalysis*, 2017, **7**, 3824-3831.
- 23 13. J. Tian, Q. Liu, A. M. Asiri and X. Sun, *Journal of the American Chemical Society*, 2014, **136**, 7587-7590.
- 24 14. X. D. Wang, Y. Cao, Y. Teng, H. Y. Chen, Y. F. Xu and D. B. Kuang, *ACS applied materials & interfaces*,  
25 2017, **9**, 32812-32819.
- 26 15. W. Lu, T. Liu, L. Xie, C. Tang, D. Liu, S. Hao, F. Qu, G. Du, Y. Ma, A. M. Asiri and X. Sun, *Small*, 2017, **13**.
- 27 16. C. Tang, R. Zhang, W. Lu, L. He, X. Jiang, A. M. Asiri and X. Sun, *Advanced materials*, 2017, **29**.
- 28 17. W. Li, S. L. Zhang, Q. N. Fan, F. Z. Zhang and S. L. Xu, *Nanoscale*, 2017, **9** (**17**), 5677-5685.
- 29 18. X. T. Wang, Y. Y. Yang, Q. C. Zhang, X. Yang, Z. A. Hu, *The Journal of Physical Chemistry C*, 2018, 122(12):  
30 6526-6538.
- 31 19. Y. Pan, K. Sun, S. Liu, X. Cao, K. Wu, W. C. Cheong, Z. Chen, Y. Wang, Y. Li, Y. Liu, D. Wang, Q. Peng, C.  
32 Chen and Y. Li, *Journal of the American Chemical Society*, 2018, 140, 2610-2618.

33
